# Supplementary material for: Aircraft observations of gravity wave activity and turbulence in the tropical tropopause layer: prevalence, influence on cirrus clouds, and comparison with global storm-resolving models
Source: Copernicus journal article supplement (doi:10.5194/acp-23-4009-2023), 2023-04-05
Supplement: Supplementary file 1 [file acp-23-4009-2023-supplement.zip]

Archive with 2 entries (2 files):
- acp-23-4009-2023-supplement-title-page.pdf
- GSRM_vertical_wind_at_14.2km_animation.gif
