# Supplementary material for: Aircraft observations of gravity wave activity and turbulence in the tropical tropopause layer: prevalence, influence on cirrus clouds, and comparison with global storm-resolving models
Source: Copernicus journal article supplement (doi:10.5194/acp-23-4009-2023), 2023-04-05
Supplement: Supplementary file 1 [file acp-23-4009-2023-supplement.zip › acp-23-4009-2023-supplement-title-page.pdf]

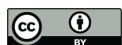

## *Supplement of*

# **Aircraft observations of gravity wave activity and turbulence in the tropical tropopause layer: prevalence, influence on cirrus clouds, and comparison with global storm-resolving models**

**Rachel Atlas and Christopher S. Bretherton**

*Correspondence to:* Rachel Atlas (rachel.atlas@lmd.ipsl.fr)

- acp-23-4009-2023-supplement-title-page.pdf
- GSRM\_vertical\_wind\_at\_14.2km\_animation.gif

The copyright of individual parts of the supplement might differ from the article licence.
